# Supplementary material for: A flower-inspired divergent light-trapping structure with quasi-spherical symmetry towards a high-performance flexible photodetector
Source: Royal Society of Chemistry journal article supplement (doi:10.1039/d0nr05206j), 2020-01-01
Supplement: d0nr05206j1.pdf [file d0nr05206j1.pdf]

# Supporting Information

## **A Flower-Inspired Divergent Light-Trapping Structure with Quasi-Spherical Symmetry towards a High-Performance Flexible Photodetector**

Sixiang Liu,<sup>a</sup> Junlong Tian,<sup>a,\*</sup> Shu Wu,<sup>a</sup> Xilin Jia,<sup>a</sup> Minyuan Luo<sup>a</sup> and Wang Zhang<sup>b</sup>

<sup>a</sup> Hunan Key Laboratory of Micro-Nano Energy Materials and Devices, Laboratory for Quantum Engineering and Micro-Nano Energy Technology, School of Physics and Optoelectronic, Xiangtan University, Hunan 411105, P. R. China.

<sup>b</sup> State Key Laboratory of Metal Matrix Composites, Shanghai Jiao Tong University, 800 Dongchuan Road, Shanghai 200240, P. R. China.

\*Author to whom correspondence should be addressed: [jltian666@xtu.edu.cn](mailto:jltian666@xtu.edu.cn)

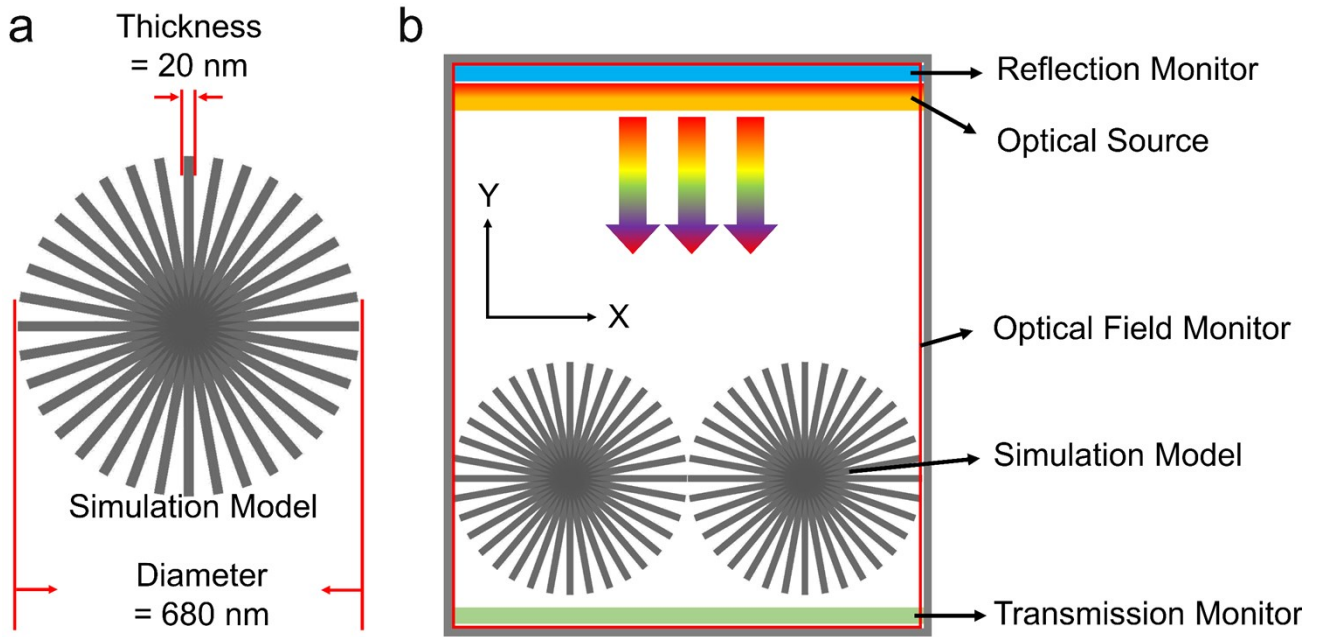

**Figure S1.** (a) Schematic diagrams of MoS<sub>2</sub>\_F. (b) Schematic illustrations of the FDTD simulations of MoS<sub>2</sub>\_F.

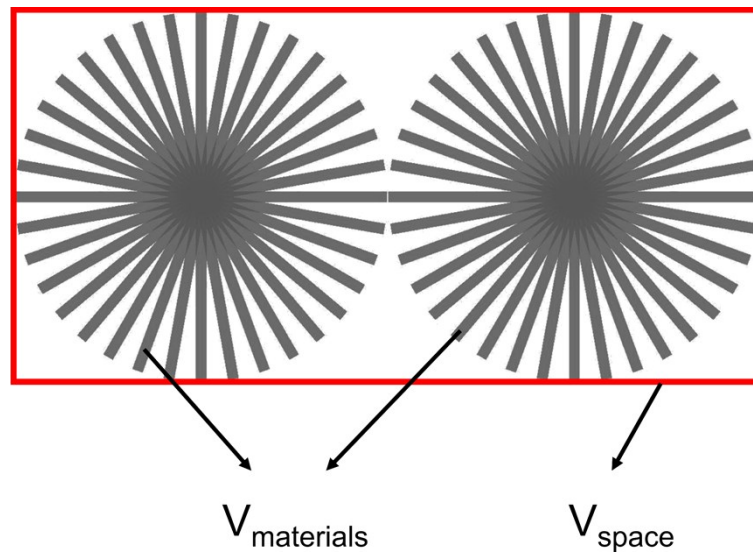

**Figure S2.** Schematic diagrams of volume of materials and volume of the space where the material is located.

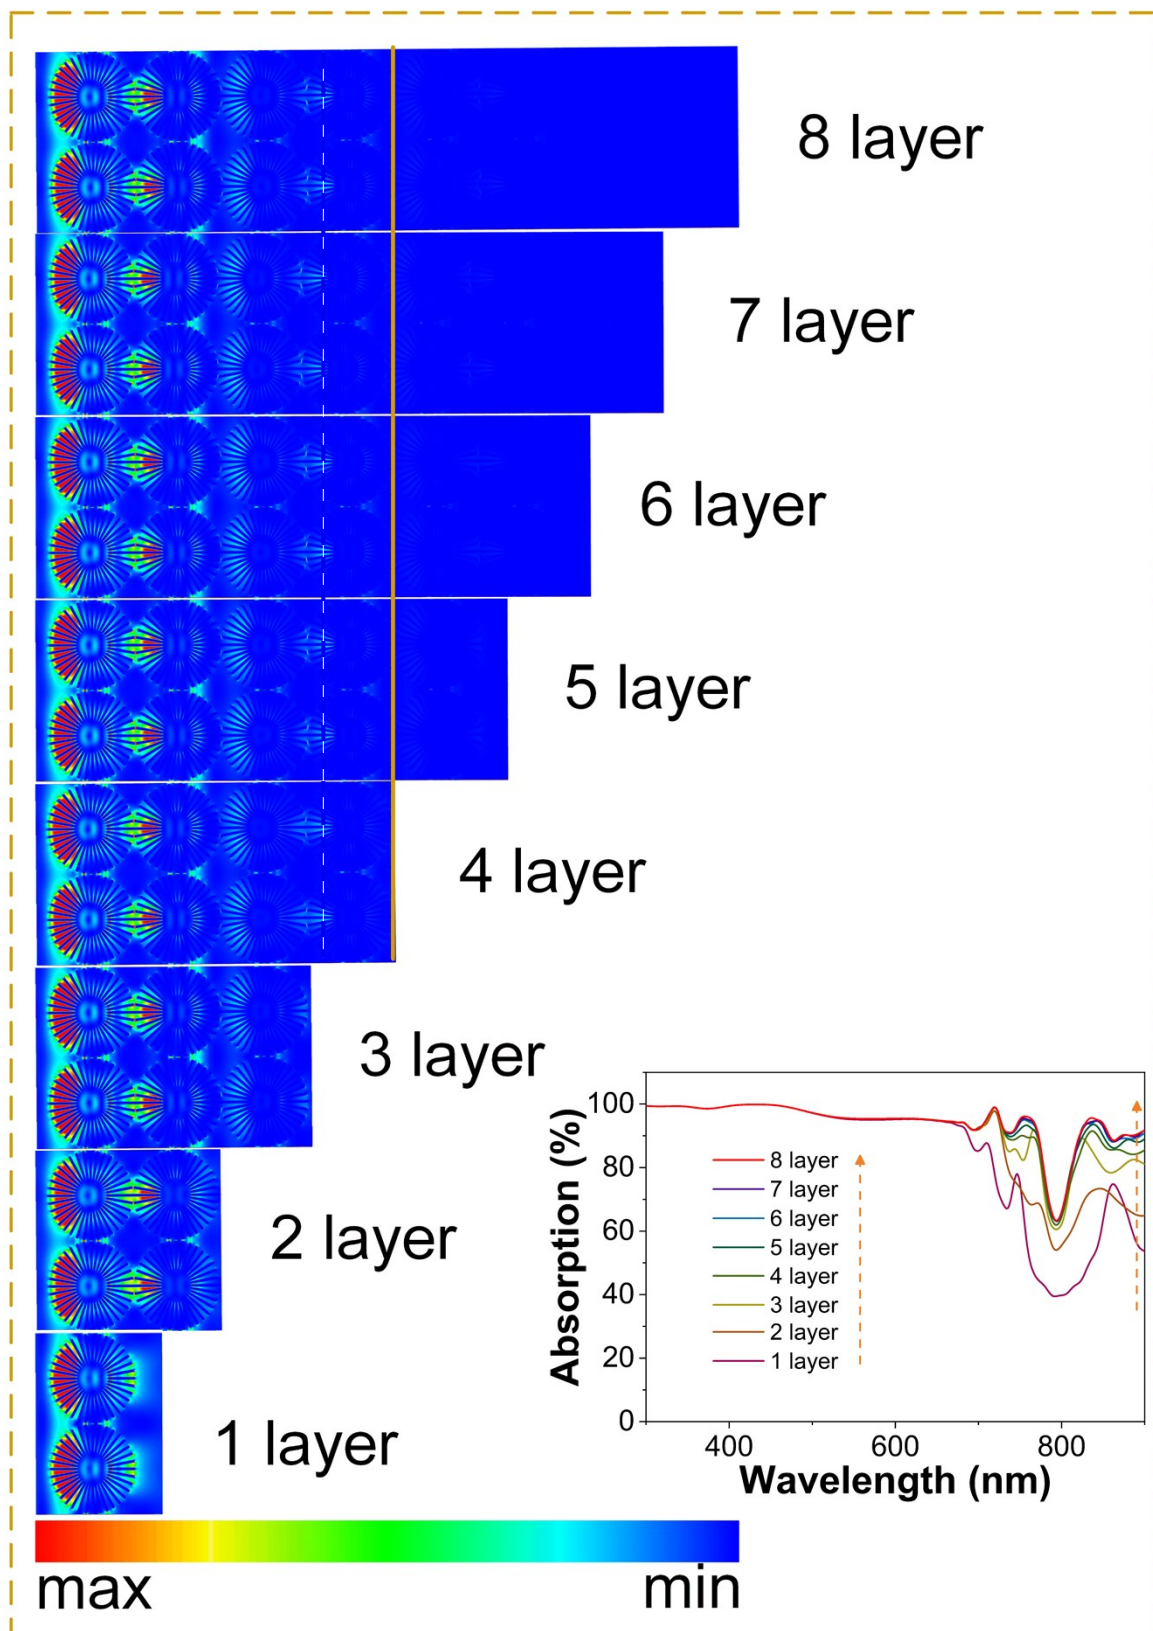

**Figure S3.** The electric field distribution ( $|E|^2$ ) of 1 to 8 layers of  $\text{MoS}_2\text{-F}$ , respectively. The insert is the light absorption of 1 to 8 layers of  $\text{MoS}_2\text{-F}$ .

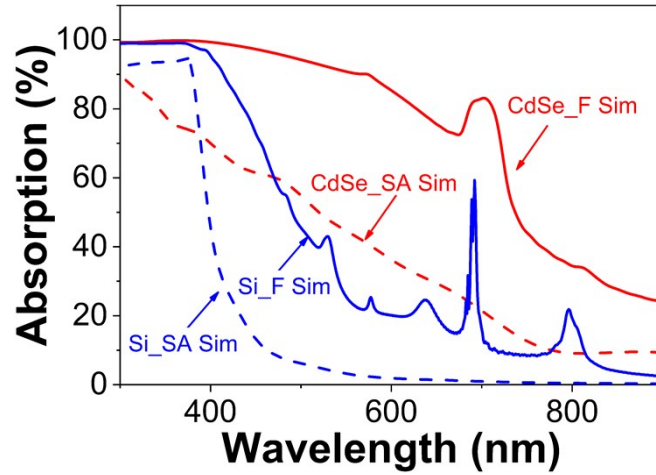

**Figure S4.** FDTD simulation of Light absorption of Si\_SA, Si\_F, CdSe\_SA, and CdSe\_F under the same  $D_{ratio}$  of 43.9% with the wavelength range of 300-900 nm, respectively.

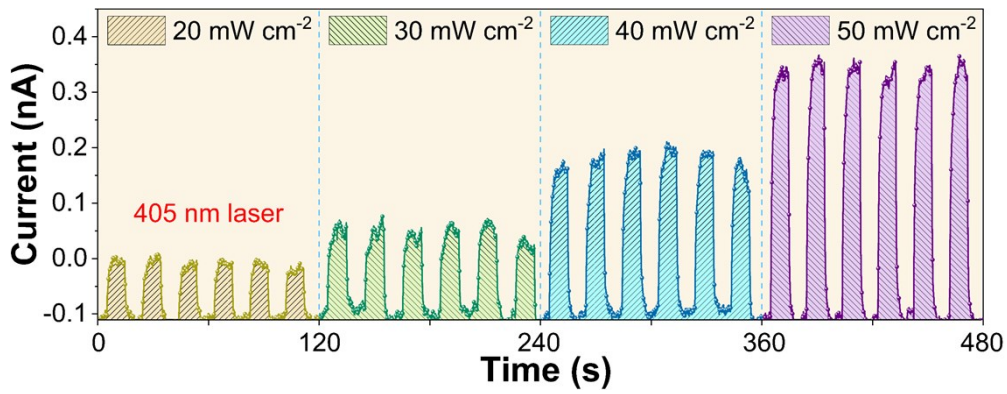

**Figure S5.**  $I-t$  characteristics of the self-powered PD under 405 nm laser illumination with different power densities from 20 to 50  $\text{mW cm}^{-2}$  at zero bias.

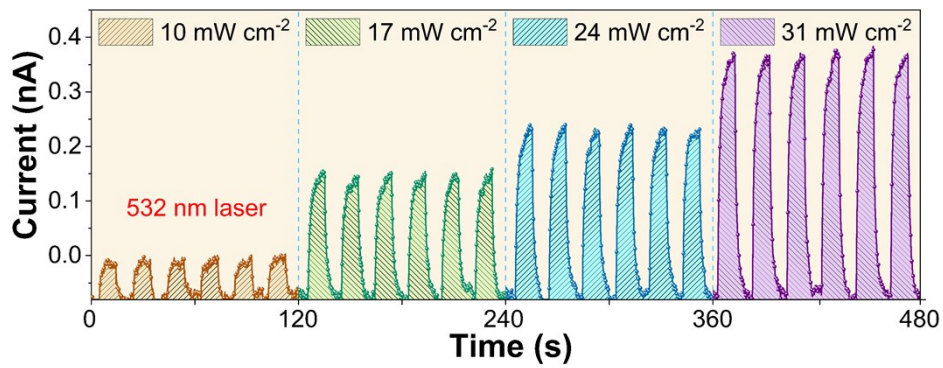

**Figure S6.**  $I-t$  characteristics of the self-powered PD under 532 nm laser illumination with different power densities from 10 to 31  $\text{mW cm}^{-2}$  at zero bias.

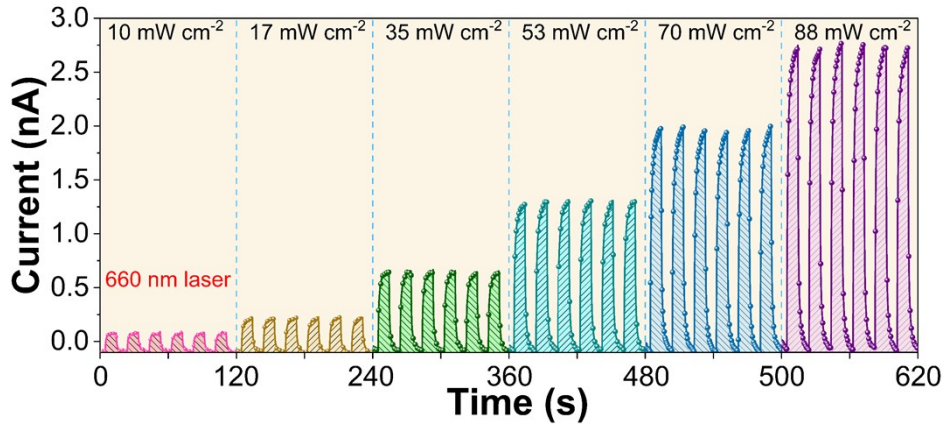

**Figure S7.** *I-t* characteristics of the self-powered PD under 660 nm laser illumination with different power densities from 10 to 88 mW cm<sup>-2</sup> at zero bias.

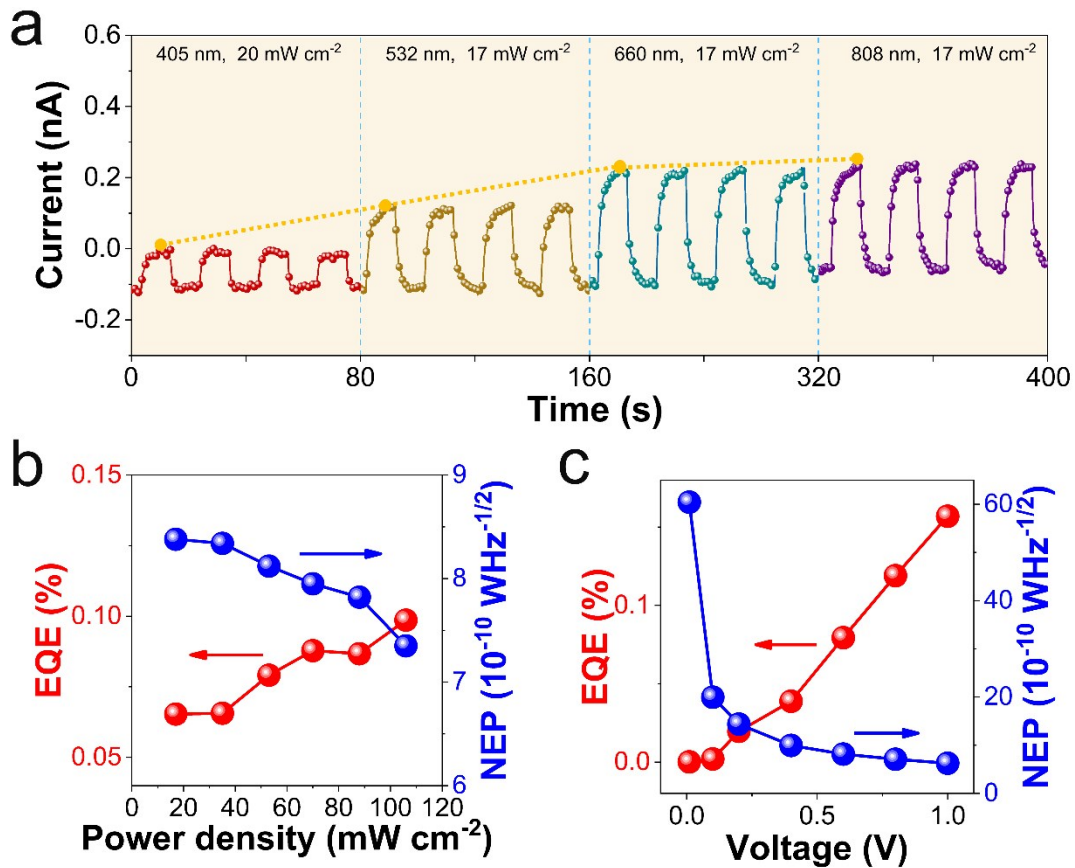

**Figure S8.** (a) Photoresponse behaviors of the self-powered PD under 405, 532, 660, and 808 nm laser illuminations at 0 V bias voltage. (b) The external quantum efficiency (EQE) and noise equivalent power (NEP) of the PD as a function of power density under 808 nm laser at zero bias. (c) The external quantum efficiency (EQE) and noise equivalent power (NEP) of the PD as a function of voltage under 808 nm laser with a power density of 106 mW cm<sup>-2</sup>.

External quantum efficiency (EQE)<sup>1,2</sup> and noise equivalent power (NEP)<sup>1-3</sup> can be calculated by the following equation:

$$EQE = R \times [hc/(e\lambda)],$$

$$NEP = \sqrt{2eI_d/R}$$

$$\text{or } NEP = (R \times \sqrt{A_0})/D,$$

where  $R$  is the responsibility at  $\lambda$  wavelength,  $h$  is Planck's constant,  $c$  is the speed of light,  $e$  is the elementary charge,  $\lambda$  is the incident light wavelength,  $I_d$  is the dark current,  $A_0$  is the active area of the fabricated device, and  $D$  is the detectivity of the PD. As is shown in **Figure S8c**, the EQE and NEP of the fabricated device can reach to 0.2% and  $6.27 \times 10^{-10} \text{ WHz}^{-1/2}$  at 1 V. Contrary to detectivity, the lower the NEP value, the better. The result shows that the increase in voltage can enhance the performance of PD to a certain extent, because the applied bias can promote the movement of carriers and then enhance the PD's performance. **Figure S8b** shows that the increase in power density is benefit to the PD's performance at zero bias.

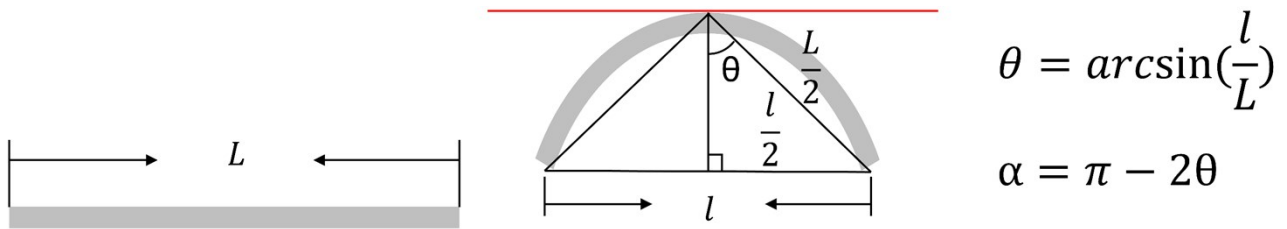

**Figure S9.** Schematic diagram of device bending and calculation formula of bending angle  $\alpha$ .

**Table S1.** The bending angle  $\alpha$  corresponding to the bending stages of the flexible device.

| Bending states | I         | II         | III         | IV          | I         |
|----------------|-----------|------------|-------------|-------------|-----------|
| $\alpha$       | $0^\circ$ | $58^\circ$ | $103^\circ$ | $151^\circ$ | $0^\circ$ |

**Table S2.** Performance comparison of MoS<sub>2</sub>-based photonic devices.

| Materials                                       | Wavelength (nm) | Bias (V) | Responsibility (mA/W) | Detectivity (Jones) | Reference                   |
|-------------------------------------------------|-----------------|----------|-----------------------|---------------------|-----------------------------|
| pristine MoS <sub>2</sub> nanosheets            | 980             | 0        | $2 \times 10^{-4}$    | $120 \pm 80$        | Yu et al. <sup>4</sup>      |
| rhodamine 6G-treated MoS <sub>2</sub> nanosheet | 980             | 0        | $6 \times 10^{-4}$    | $300 \pm 200$       | Yu et al. <sup>4</sup>      |
| single-layer MoS <sub>2</sub> nanosheet         | 550             | 0        | 0.42                  | -                   | Yin et al. <sup>5</sup>     |
| MoTe <sub>2</sub> /MoS <sub>2</sub> nanosheet   | 1550            | 0.8      | $17 \times 10^{-3}$   | -                   | Zhang et al. <sup>6</sup>   |
| MoS <sub>2</sub> with Au nano-antenna arrays    | 830             | 0        | 0.013                 | -                   | Hou et al. <sup>7</sup>     |
| MoS <sub>2</sub> nanosheet arrays               | 532             | 0        | 6                     | -                   | Rahmati et al. <sup>8</sup> |
| MoS <sub>2</sub> _F                             | 808             | 1        | 1.4                   | $3.4 \times 10^5$   | This work                   |
| MoS <sub>2</sub> _F                             | 808             | 0        | $6.5 \times 10^{-3}$  | $2.7 \times 10^5$   | This work                   |

## References

1. M. Buscema, J. O. Island, D. J. Groenendijk, S. I. Blanter, G. A. Steele, H. S. J. van der Zant and A. Castellanos-Gomez, *Chem. Soc. Rev.*, 2015, **44**, 3691-3718.
2. R. K. Ulaganathan, Y.-Y. Lu, C.-J. Kuo, S. R. Tamalampudi, R. Sankar, K. M. Boopathi, A. Anand, K. Yadav, R. J. Mathew, C.-R. Liu, F. C. Chou and Y.-T. Chen, *Nanoscale*, 2016, **8**, 2284-2292.
3. L. Goswami, N. Aggarwal, M. Singh, R. Verma, P. Vashishtha, S. K. Jain, J. Tawale, R. Pandey and G. Gupta, *ACS Appl. Nano Mater.*, 2020, **3**, 8104-8116.
4. S. H. Yu, Y. Lee, S. K. Jang, J. Kang, J. Jeon, C. Lee, J. Y. Lee, H. Kim, E. Hwang, S. Lee and J. H. Cho, *ACS Nano*, 2014, **8**, 8285-8291.
5. Z. Yin, H. Li, H. Li, L. Jiang, Y. Shi, Y. Sun, G. Lu, Q. Zhang, X. Chen and H. Zhang, *ACS Nano*, 2012, **6**, 74-80.
6. K. Zhang, T. Zhang, G. Cheng, T. Li, S. Wang, W. Wei, X. Zhou, W. Yu, Y. Sun, P. Wang, D. Zhang, C. Zeng, X. Wang, W. Hu, H. J. Fan, G. Shen, X. Chen, X. Duan, K. Chang and N. Dai, *ACS Nano*, 2016, **10**, 3852-3858.
7. C. Hou, Y. Wang, L. Yang, B. Li, Z. Cao, Q. Zhang, Y. Wang, Z. Yang and L. Dong, *Nano Energy*, 2018, **53**, 734-744.
8. B. Rahmati, I. Hajzadeh, R. Karimzadeh and S. M. Mohseni, *Appl. Surf. Sci.*, 2018, **455**, 876-882.
